# Supplementary material for: Vitamin D supplementation improves serum markers associated with hepatic fibrogenesis in chronic hepatitis C patients: A randomized, double-blind, placebo-controlled study
Source: PubMed Central journal article supplement (PMC5566364; doi:10.1038/s41598-017-09512-7), 2017-08-21
Supplement: 41598_2017_9512_MOESM1_ESM.pdf [file 41598_2017_9512_MOESM1_ESM.pdf]

## Supplementary information

### **Vitamin D supplementation improves serum markers associated with hepatic fibrogenesis in chronic hepatitis C patients: A randomized, double-blind, placebo-controlled study**

Piyawat Komolmit\* <sup>1, 2</sup>, Sayamon Kimtrakool<sup>3</sup>, Sirinporn Suksawatamnuay<sup>1, 2</sup>, Kessarin Thanapirom<sup>1, 2</sup>, Kanita Chattrasophon<sup>4</sup>, Panarat Thaimai<sup>1</sup>, Chintana Chirathaworn<sup>5</sup>, and Yong Poovorawan<sup>6</sup>

1 Division of Gastroenterology, Department of Medicine, Faculty of Medicine, Chulalongkorn University, Bangkok, Thailand

2 Center of Excellence in Liver Diseases: King Chulalongkorn Memorial Hospital, Thai Red Cross Society, Bangkok, Thailand

3 Gastroenterology Unit, Department of Medicine, Lerdsin Hospital, Bangkok, Thailand

4 Gastroenterology Unit, Department of Medicine, Taksin Hospital, Bangkok, Thailand

5 Division of Immunology, Department of Microbiology, Faculty of Medicine, Chulalongkorn University, Bangkok, Thailand

6 Center of Excellence in Clinical Virology, Faculty of Medicine, Chulalongkorn University, Bangkok, Thailand

\* Corresponding author: Piyawat Komolmit, M.D., Ph.D.

Division of Gastroenterology, Department of Medicine, Faculty of Medicine, Chulalongkorn University, Bangkok 10330, Thailand

Tel: +662-2564265, +669-47825195, email: pkomolmit@yahoo.co.uk

| <b>Table of contents</b>       | <b>page</b> |
|--------------------------------|-------------|
| <b>1. Supplementary tables</b> | <b>2</b>    |
| <b>2. Data set</b>             | <b>9</b>    |

## **1. SUPPLEMENTARY TABLES**

**Supplementary Table S1.** VD levels at baseline (A), 6-week follow up (B) and the delta changes of VD at 6 weeks (C); VD levels are in ng/mL

**(A)** VD levels at baseline

| Groups         | VD levels  | N  | Mean $\pm$ SD  | Min  | Max  | Range |
|----------------|------------|----|----------------|------|------|-------|
| VD Replacement | < 20       | 11 | 14.8 $\pm$ 4.4 | 6.6  | 19.7 | 13.1  |
|                | 20 to < 30 | 18 | 23.1 $\pm$ 2.5 | 20.0 | 29.6 | 9.6   |
|                | Total      | 29 | 19.9 $\pm$ 5.3 | 6.6  | 29.6 | 23.0  |
| <hr/>          |            |    |                |      |      |       |
| Placebo        | < 20       | 15 | 14.6 $\pm$ 3.3 | 9.5  | 19.5 | 10    |
|                | 20 to < 30 | 14 | 23.8 $\pm$ 2.2 | 20.1 | 27.0 | 6.9   |
|                | Total      | 29 | 19.0 $\pm$ 5.5 | 9.5  | 27.0 | 17.5  |

**(B)** VD levels at 6-week follow up

| Groups         | VD levels  | N  | Mean $\pm$ SD   | Min  | Max  | Range |
|----------------|------------|----|-----------------|------|------|-------|
| VD Replacement | < 20       | 11 | 45.4 $\pm$ 16.1 | 24.0 | 70.8 | 46.8  |
|                | 20 to < 30 | 18 | 45.8 $\pm$ 10.5 | 27.9 | 64.4 | 36.5  |
|                | Total      | 29 | 45.6 $\pm$ 12.6 | 24.0 | 70.8 | 46.8  |
| <hr/>          |            |    |                 |      |      |       |
| Placebo        | < 20       | 15 | 15.6 $\pm$ 3.9  | 9.8  | 22.7 | 12.9  |
|                | 20 to < 30 | 14 | 23.9 $\pm$ 2.5  | 20.1 | 27.9 | 8.8   |
|                | Total      | 29 | 19.6 $\pm$ 5.3  | 9.5  | 27.9 | 18.1  |

**(C)** The delta changes of VD at 6 weeks

| Groups         | VD levels  | N  | Mean $\pm$ SD   | Min  | Max  | Range |
|----------------|------------|----|-----------------|------|------|-------|
| VD Replacement | < 20       | 11 | 30.6 $\pm$ 16.1 | 8.4  | 60.2 | 51.8  |
|                | 20 to < 30 | 18 | 22.7 $\pm$ 11.2 | -1.7 | 40.1 | 41.8  |
|                | Total      | 29 | 25.7 $\pm$ 13.5 | -1.7 | 60.2 | 61.9  |
| <hr/>          |            |    |                 |      |      |       |
| Placebo        | < 20       | 15 | 1.0 $\pm$ 2.8   | -3.5 | 6.6  | 10.1  |
|                | 20 to < 30 | 14 | 0.07 $\pm$ 2.6  | -5.4 | 3.9  | 9.3   |
|                | Total      | 29 | 0.6 $\pm$ 2.7   | -5.4 | 6.6  | 12.0  |

**Supplementary Table S2.** VD levels at baseline, and the delta changes of VD and serum markers

The data are showed in mean  $\pm$  SD. The levels of VD and other markers are shown in ng/mL, except for the levels of TGF  $\beta$ 1 are shown in pg/mL.

| Groups         | VD levels at baseline | Changes in the levels at 6 weeks (delta changes) |                   |                |                   |                  |
|----------------|-----------------------|--------------------------------------------------|-------------------|----------------|-------------------|------------------|
|                |                       | VD                                               | TGF $\beta$ 1     | TIMP-1         | MMP2              | MMP9             |
| VD Replacement | < 20                  | 30.6 $\pm$ 16.1                                  | -23.1 $\pm$ 136.0 | -0.2 $\pm$ 0.6 | 57.8 $\pm$ 152.0  | 20.2 $\pm$ 56.4  |
|                | 20 to < 30            | 22.7 $\pm$ 11.2                                  | -25.5 $\pm$ 101.0 | -0.1 $\pm$ 0.3 | 48.8 $\pm$ 110.3  | 41.2 $\pm$ 25.3  |
|                | Total                 | 25.7 $\pm$ 13.5                                  | -24 $\pm$ 113.2   | -0.1 $\pm$ 0.4 | 51.7 $\pm$ 121.4  | 34.2 $\pm$ 38.6  |
| Placebo        | < 20                  | 1.0 $\pm$ 2.8                                    | 16.4 $\pm$ 79.2   | 0.4 $\pm$ 1.1  | -45.8 $\pm$ 144.6 | -24.9 $\pm$ 22.6 |
|                | 20 to < 30            | 0.07 $\pm$ 2.6                                   | 100.8 $\pm$ 119.0 | 0.3 $\pm$ 0.3  | -36.5 $\pm$ 109.6 | -21.5 $\pm$ 32.0 |
|                | Total                 | 0.6 $\pm$ 2.7                                    | 57.1 $\pm$ 107.5  | 0.4 $\pm$ 0.8  | -41.9 $\pm$ 128.6 | -23.4 $\pm$ 26.6 |

**Supplementary Table S3.** The characteristic of 3 patients in VD group whose vitamin D levels remained lower than 30 ng/mL after 6-week replacement. (A) the basic characteristics, (B) the changes of the markers after 6-week VD replacement

(A)

| Case | Age | Gender | Genotype | Viral load (IU/mL) | Cirrhosis | Pre VD Level (ng/mL) | Post VD level (ng/mL) | VD changes (ng/mL) |
|------|-----|--------|----------|--------------------|-----------|----------------------|-----------------------|--------------------|
| 1    | 53  | M      | 3        | 3244589            | yes       | 15.8                 | 25.9                  | 10.1               |
| 2*   | 47  | M      | 3        | 2175432            | no        | 29.6                 | 27.9                  | -1.7               |
| 3    | 54  | F      | 3        | 1713               | yes       | 15.6                 | 24.0                  | 8.4                |

(B)

| Case | TGF $\beta$ 1 changes** | TIMP1 changes** | MMP2 changes* | MMP9 changes** |
|------|-------------------------|-----------------|---------------|----------------|
| 1    | - 371                   | - 1.01          | 91.49         | - 106          |
| 2    | - 126                   | - 0.3           | 21.26         | 65.6           |
| 3    | - 17.3                  | 0.38            | NA            | 62.7           |

\* case number 2 had a reduction of VD level of 1.7 ng/mL after 6 weeks replacement

\*\* The changes in favor of decreasing fibrogenesis: reduction (minus) of TGF  $\beta$ 1 and TIMP-1 and increment (plus) of in MMP2 and MMP9 levels

**Supplementary Table S4.** Changes of transaminase levels and hepatitis C viral load after 6-week vitamin D supplementation in vitamin D supplement group (A), placebo group (B)

(A)

| Parameters (n*) | VD supplement group |             |              |         |                |
|-----------------|---------------------|-------------|--------------|---------|----------------|
|                 | Baseline            | At 6 weeks  | Mean changes | p-value | 95%CI          |
| AST** (22)      | 90.9 ± 65.6         | 83.7 ± 68.9 | -7.2 ± 67.4  | 0.62    | - 37.1 – 22.6  |
| ALT** (22)      | 116.7 ± 96.6        | 78.0 ± 60.3 | -38.1 ± 70.5 | 0.02    | -69.3 – (-6.8) |

(B)

| Parameters (n*) | Placebo group |              |              |         |              |
|-----------------|---------------|--------------|--------------|---------|--------------|
|                 | Baseline      | At 6 weeks   | Mean changes | p-value | 95%CI        |
| AST** (23)      | 83.4± 50.6    | 82.1 ± 60.8  | -1.32 ± 49.4 | 0.90    | -23.2 – 20.6 |
| ALT** (23)      | 102.5 ± 69.9  | 101.8 ± 74.9 | -0.73 ± 34.7 | 0.92    | -16.1 – 14.7 |

\* Number of the patients who had paired pre-and post-supplement levels in each group were used for calculation.

\*\* IU/mL

**Supplementary Table S5. Changes of hepatitis C viral loads**

(A) comparison of HCV viral load between at the results from the beginning of the trial (original tests) and the stored plasma.

| Mean HCV RNA viral load at baseline (log IU/mL) |                             |              |         |              |
|-------------------------------------------------|-----------------------------|--------------|---------|--------------|
| Original tests<br>(51 cases)                    | Stored plasma<br>(51 cases) | Mean changes | p-value | 95%CI        |
| 5.57 ± 0.83                                     | 5.29 ± 1.00                 | -0.28 ± 0.90 | 0.028   | -0.54, -0.03 |

(B) Hepatitis C viral loads at baseline and after 6-week of vitamin D or placebo supplementation (assessed in stored plasma)

| Groups (n)   | Mean HCV viral load (log IU/mL) at |            |              |         |              |
|--------------|------------------------------------|------------|--------------|---------|--------------|
|              | Baseline                           | At 6 weeks | Mean changes | p-value | 95%CI        |
| VD (27)      | 5.29 ± 0.94                        | 5.3 ± 0.88 | 0.01 ± 0.58  | 0.93    | -0.22 – 0.24 |
| placebo (27) | 5.26 ± 1.07                        | 5.3 ± 1.15 | 0.04 ± 1.00  | 0.82    | -0.35 – 0.44 |

**Supplementary Table S6.** Changes in the mean levels of VD, TGF  $\beta$ 1, TIMP-1, MMP2 and MMP9 after 6-weeks VD supplementation of different variables including genders, vitamin D levels at baseline, hepatitis C genotypes and cirrhotic status (only in vitamin D supplement group)

| variables             | Subgroups (n) and p values | Changes in mean levels (delta changes) |                   |                  |                  |                 |
|-----------------------|----------------------------|----------------------------------------|-------------------|------------------|------------------|-----------------|
|                       |                            | VD                                     | TGF $\beta$ 1     | TIMP-1           | MMP2             | MMP9            |
| Gender                | M (21)                     | 26.9 $\pm$ 10.6                        | -31.6 $\pm$ 77.9  | -0.20 $\pm$ 0.36 | 41.4 $\pm$ 109.1 | 31.8 $\pm$ 29.2 |
|                       | F (8)                      | 22.6 $\pm$ 17.4                        | -6.3 $\pm$ 152.4  | 0.07 $\pm$ 0.43  | 79.2 $\pm$ 64.6  | 40.2 $\pm$ 51.7 |
|                       | p values                   | 0.21                                   | 0.14              | 0.74             | 0.53             | 0.66            |
| VD levels at baseline | < 20 (11)                  | 30.6 $\pm$ 16.1                        | -23.1 $\pm$ 136.0 | -0.17 $\pm$ 0.57 | 57.8 $\pm$ 152.0 | 20.2 $\pm$ 56.4 |
|                       | 20 to < 30 (18)            | 22.6 $\pm$ 11.2                        | -25.5 $\pm$ 101.0 | -0.10 $\pm$ 0.30 | 48.8 $\pm$ 110.3 | 41.2 $\pm$ 25.3 |
|                       | p values                   | 0.34                                   | 0.50              | 0.08             | 0.37             | 0.06            |
| Genotypes**           | 1 (15)                     | 26.9 $\pm$ 10.6                        | -34.9 $\pm$ 77.9  | -0.05 $\pm$ 0.36 | 48.9 $\pm$ 109.1 | 38.5 $\pm$ 29.2 |
|                       | 3 (12)                     | 23.9 $\pm$ 17.4                        | -26.9 $\pm$ 152.4 | -0.30 $\pm$ 0.43 | -5.9 $\pm$ 64.6  | 27.7 $\pm$ 51.7 |
|                       | p values                   | 0.09                                   | 0.08              | 0.24             | 0.22             | 0.22            |
| Cirrhosis             | Yes (11)                   | 19.2 $\pm$ 29.7                        | -23.6 $\pm$ 147.9 | -0.21 $\pm$ 0.45 | 12.8 $\pm$ 82.6  | 28.8 $\pm$ 54.3 |
|                       | No (18)                    | 29.7 $\pm$ 14.7                        | -25.2 $\pm$ 90.6  | -0.08 $\pm$ 0.41 | 81.9 $\pm$ 134.4 | 37.5 $\pm$ 27.0 |
|                       | p values                   | 0.14                                   | 0.32              | 0.38             | 0.28             | 0.25            |

\* Levels are in ng/mL, except for TGF  $\beta$ 1 levels are in pg/mL

\*\* Two cases of genotype 2 and 6 were not included for analysis.



## **2. DATA SET**

| Person | HN       | Age | Sex_forma | Sex | Genotype | G1 | G1_3 | Pre_HCV_\Log_Pre_H |        |
|--------|----------|-----|-----------|-----|----------|----|------|--------------------|--------|
| 1      | 7646956  | 39  | F         | 2   | 3        | 2  | 2    | 2710496            | 6.43   |
| 2      | 9956856  | 38  | M         | 1   | 1        | 1  | 1    | 59083              | 4.77   |
| 3      | 5774055  | 43  | M         | 1   | 3        | 2  | 2    | 714135             | 5.85   |
| 4      | 10120356 | 53  | M         | 1   | 3        | 2  | 2    | 1333896            | 6.13   |
| 5      | 477257   | 47  | M         | 1   | 3        | 2  | 2    | 16236              | 4.21   |
| 6      | 519157   | 58  | F         | 2   | 3        | 2  | 2    | 546924             | 5.74   |
| 7      | 6990956  | 37  | M         | 1   | 1        | 1  | 1    | 1669871            | 6.22   |
| 8      | 9528054  | 45  | F         | 2   | 1        | 1  | 1    | 421815             | 5.63   |
| 9      | 1801857  | 63  | F         | 2   | 1        | 1  | 1    | 6383               | 3.81   |
| 10     | 1826857  | 55  | M         | 1   | 3        | 2  | 2    | 5547               | 3.74   |
| 11     | 6887429  | 59  | F         | 2   | 1        | 1  | 1    | 485398             | 5.69   |
| 12     | 616457   | 51  | M         | 1   | 1        | 1  | 1    | 611938             | 5.79   |
| 13     | 1238557  | 55  | M         | 1   | 3        | 2  | 2    | 1461               | 3.16   |
| 14     | 30413657 | 39  | M         | 1   | 3        | 2  | 2    | 38774              | 4.59   |
| 15     | 4559554  | 26  | M         | 1   | 1        | 1  | 1    | 906649             | 5.96   |
| 16     | 980547   | 56  | M         | 1   | 1        | 1  | 1    | 176634             | 5.25   |
| 17     | 6396142  | 53  | M         | 1   | 3        | 2  | 2    | 348983             | 5.54   |
| 18     | 13220439 | 62  | M         | 1   | 1        | 1  | 1    | 1391280            | 6.14   |
| 19     | 10491256 | 46  | F         | 2   | 3        | 2  | 2    | 407266             | 5.61   |
| 20     | 4384043  | 70  | F         | 2   | 1        | 1  | 1    | 4188641            | 6.62   |
| 21     | 30612157 | 35  | M         | 1   | 1        | 1  | 1    | 2090470            | 6.32   |
| 22     | 3350349  | 65  | F         | 2   | 1        | 1  | 1    | 1855302            | 6.27   |
| 23     | 5884356  | 39  | F         | 2   | 6        | 2  | 3    | 85713              | 4.93   |
| 24     | 11707844 | 62  | F         | 2   | 1        | 1  | 1    | 3441179            | 6.54   |
| 25     | 1313855  | 56  | F         | 2   | 1        | 1  | 1    | 2544543            | 6.41   |
| 26     | 30910757 | 28  | M         | 1   | 1        | 1  | 1    | 624962             | 5.80   |
| 27     | #NULL!   | 45  | M         | 1   | 3        | 2  | 2    | 1371883            | 6.14   |
| 28     | #NULL!   | 52  | M         | 1   | 1        | 1  | 1    | 1234768            | 6.09   |
| 29     | #NULL!   | 41  | M         | 1   | 2        | 2  | 3    | 14410              | 4.16   |
| 30     | #NULL!   | 58  | M         | 1   | 3        | 2  | 2    | 1043313            | 6.02   |
| 31     | 30806757 | 60  | F         | 2   | 1        | 1  | 1    | 1043313            | 6.02   |
| 32     | 5633456  | 56  | M         | 1   | 1        | 1  | 1    | 670411             | 5.83   |
| 33     | 7002252  | 48  | M         | 1   | 3        | 2  | 2    | 12090              | 4.08   |
| 34     | 8282555  | 69  | M         | 1   | 3        | 2  | 2    | 40727              | 4.61   |
| 35     | 6753653  | 43  | M         | 1   | 3        | 2  | 2    | 180393             | 5.26   |
| 36     | 2162555  | 56  | M         | 1   | 3        | 2  | 2    | #NULL!             | #NULL! |
| 37     | 8455354  | 55  | M         | 1   | 3        | 2  | 2    | 4992               | 3.70   |
| 38     | 8965956  | 28  | F         | 2   | 3        | 2  | 2    | 235545             | 5.37   |
| 39     | 633256   | 68  | F         | 2   | 1        | 1  | 1    | 8047               | 3.91   |
| 40     | 11221152 | 45  | M         | 1   | 3        | 2  | 2    | 73965              | 4.87   |
| 41     | 31470257 | 48  | M         | 1   | 1        | 1  | 1    | 55856              | 4.75   |
| 42     | 11875940 | 27  | F         | 2   | 1        | 1  | 1    | 651848             | 5.81   |
| 43     | #NULL!   | 43  | M         | 1   | 1        | 1  | 1    | 755389             | 5.88   |
| 44     | 31036957 | 50  | F         | 2   | 1        | 1  | 1    | 68468              | 4.84   |
| 45     | 31983957 | 57  | M         | 1   | 3        | 2  | 2    | 129696             | 5.11   |
| 46     | 1910751  | 62  | F         | 2   | 1        | 1  | 1    | 1050663            | 6.02   |

|    |          |      |   |     |   |         |        |
|----|----------|------|---|-----|---|---------|--------|
| 47 | 10909555 | 53 M | 1 | 3 2 | 2 | 1949    | 3.29   |
| 48 | 6630650  | 52 M | 1 | 1 1 | 1 | 3639968 | 6.56   |
| 49 | 33320357 | 61 M | 1 | 3 2 | 2 | 286707  | 5.46   |
| 50 | 5442255  | 50 F | 2 | 3 2 | 2 | 670411  | 5.83   |
| 51 | 1631857  | 57 M | 1 | 1 1 | 1 | 499     | 2.70   |
| 52 | 5784354  | 54 F | 2 | 3 2 | 2 | 7934    | 3.90   |
| 53 | 10204249 | 57 M | 1 | 1 1 | 1 | #NULL!  | #NULL! |
| 54 | 30443757 | 39 F | 2 | 1 1 | 1 | 7449    | 3.87   |
| 55 | #NULL!   | 50 M | 1 | 3 2 | 2 | #NULL!  | #NULL! |
| 56 | 2854557  | 59 F | 2 | 1 1 | 1 | 2105197 | 6.32   |
| 57 | 33757357 | 42 F | 2 | 1 1 | 1 | 320789  | 5.51   |
| 58 | 33825057 | 55 M | 1 | 1 1 | 1 | #NULL!  | #NULL! |

| Post_HCV_Log_Post_IHCV_VL | Log7   | Fibroscan | Significant | Underlying | Status_for | Naive | Cirrhosis_f |   |   |
|---------------------------|--------|-----------|-------------|------------|------------|-------|-------------|---|---|
| 1681635                   | 6.23   | 2985070   | 1           | 7.60       | 1          | N     | New         | 1 | N |
| 110358                    | 5.04   | 261019    | 2           | 16.60      | 1          | N     | New         | 1 | N |
| 750105                    | 5.88   | 2082352   | 1           | 8.50       | 1          | N     | New         | 1 | N |
| 1261048                   | 6.10   | 3244589   | 1           | 48.80      | 1          | HT    | New         | 1 | Y |
| 105066                    | 5.02   | 2175432   | 1           | 18.40      | 1          | HT    | New         | 1 | N |
| 719166                    | 5.86   | 146548    | 2           | 4.40       | 2          | N     | New         | 1 | N |
| 1088196                   | 6.04   | 589257    | 2           | 6.80       | 2          | N     | New         | 1 | N |
| 377000                    | 5.58   | 112151    | 2           | 15.10      | 1          | DLP   | New         | 1 | Y |
| 1287888                   | 6.11   | 810747    | 2           | 14.50      | 1          | N     | New         | 1 | N |
| 6751                      | 3.83   | 5512      | 2           | 26.30      | 1          | N     | New         | 1 | Y |
| 611938                    | 5.79   | 280055    | 2           | 16.30      | 1          | N     | New         | 1 | Y |
| 62059                     | 4.79   | 464905    | 2           | 4.30       | 2          | N     | New         | 1 | N |
| 8160                      | 3.91   | 22689     | 2           | 17.20      | 1          | HT    | New         | 1 | Y |
| 13061                     | 4.12   | 147583    | 2           | 8.20       | 1          | N     | New         | 1 | N |
| 1693482                   | 6.23   | 354167    | 2           | 6.80       | 2          | N     | New         | 1 | N |
| 3465422                   | 6.54   | 330866    | 2           | 8.00       | 1          | N     | Fail        | 2 | N |
| 126105                    | 5.10   | 199755    | 2           | 9.10       | 1          | N     | Fail        | 2 | Y |
| 88775                     | 4.95   | 2779077   | 1           | 19.40      | 1          | N     | New         | 1 | N |
| 488817                    | 5.69   | 259188    | 2           | 9.00       | 1          | N     | New         | 1 | N |
| 2526742                   | 6.40   | 2905447   | 1           | 11.20      | 1          | HT    | Fail        | 2 | N |
| 5027377                   | 6.70   | 4790000   | 1           | 10.10      | 1          | N     | New         | 1 | N |
| 900306                    | 5.95   | 651000    | 2           | 14.20      | 1          | N     | Fail        | 2 | Y |
| 193512                    | 5.29   | 338000    | 2           | 13.00      | 1          | N     | New         | 1 | N |
| 2090470                   | 6.32   | 700000    | 2           | 6.80       | 2          | N     | New         | 1 | N |
| 1461356                   | 6.16   | 1844394   | 1           | 21.50      | 1          | N     | New         | 1 | Y |
| 233897                    | 5.37   | #NULL!    | #NULL!      | 8.70       | 1          | N     | New         | 1 | N |
| 709140                    | 5.85   | 5394957   | 1           | 8.30       | 1          | N     | New         | 1 | N |
| 679891                    | 5.83   | 1563728   | 1           | 30.80      | 1          | HT    | New         | 1 | Y |
| 656                       | 2.82   | 668604    | 2           | 9.20       | 1          | N     | New         | 1 | N |
| 1143007                   | 6.06   | 1645146   | 1           | 21.80      | 1          | N     | New         | 1 | N |
| 34654                     | 4.54   | 869877    | 2           | 16.00      | 1          | N     | New         | 1 | N |
| 1080584                   | 6.03   | 4799992   | 1           | 21.30      | 1          | HT    | New         | 1 | Y |
| 13815                     | 4.14   | 1322132   | 1           | 15.30      | 1          | N     | Fail        | 2 | N |
| 9726                      | 3.99   | 81389     | 2           | 17.30      | 1          | N     | Fail        | 2 | N |
| 301148                    | 5.48   | 211391    | 2           | 11.30      | 1          | N     | New         | 1 | N |
| #NULL!                    | #NULL! | 2082352   | 1           | #NULL!     | 2          | N     | New         | 1 | Y |
| 14                        | 1.15   | #NULL!    | #NULL!      | 3.90       | 2          | N     | New         | 1 | N |
| 55078                     | 4.74   | 144069    | 2           | 6.40       | 2          | N     | New         | 1 | N |
| 22425                     | 4.35   | 181907    | 2           | 15.00      | 1          | N     | New         | 1 | Y |
| 232261                    | 5.37   | 289916    | 2           | 20.80      | 1          | N     | New         | 1 | Y |
| 188153                    | 5.27   | 459404    | 2           | 23.10      | 1          | N     | New         | 1 | Y |
| 356411                    | 5.55   | 1703623   | 1           | 21.30      | 1          | N     | New         | 1 | N |
| 675134                    | 5.83   | 4447651   | 1           | 7.00       | 1          | N     | New         | 1 | N |
| 21052                     | 4.32   | 159807    | 2           | 29.50      | 1          | N     | New         | 1 | Y |
| 65644                     | 4.82   | 543708    | 2           | 30.30      | 1          | N     | New         | 1 | Y |
| 782374                    | 5.89   | 538000    | 2           | 6.40       | 2          | N     | New         | 1 | N |

|         |        |         |        |         |   |      |   |   |
|---------|--------|---------|--------|---------|---|------|---|---|
| 4923    | 3.69   | 244977  | 2      | 27.30 1 | N | Fail | 2 | Y |
| 1829435 | 6.26   | 1812    | 2      | 21.60 1 | N | Fail | 2 | Y |
| 611938  | 5.79   | 379262  | 2      | 11.00 1 | N | New  | 1 | N |
| 1175558 | 6.07   | 264252  | 2      | 31.20 1 | N | New  | 1 | Y |
| 90031   | 4.95   | 3251    | 2      | 24.70 1 | N | New  | 1 | Y |
| 374363  | 5.57   | 1713    | 2      | 39.70 1 | N | New  | 1 | Y |
| #NULL!  | #NULL! | #NULL!  | #NULL! | 6.10 2  | N | New  | 1 | N |
| 233897  | 5.37   | 62553   | 2      | 7.80 1  | N | New  | 1 | N |
| #NULL!  | #NULL! | #NULL!  | #NULL! | 21.50 1 | N | New  | 1 | N |
| 993283  | 6.00   | 1232944 | 1      | 17.30 1 | N | New  | 1 | N |
| 546924  | 5.74   | #NULL!  | #NULL! | 8.20 1  | N | New  | 1 | N |
| #NULL!  | #NULL! | 257831  | 2      | 7.40 1  | N | New  | 1 | N |

| Cirrhosis | Interventic | Interventic Hb | Wbc   | Platelet | PT   | INR  | TB   | DB   |
|-----------|-------------|----------------|-------|----------|------|------|------|------|
| 2 BB      | 2           | 13.1           | 6870  | 294000   | 12.3 | 1.08 | 0.66 | 0.35 |
| 2 BB      | 2           | 15.5           | 6670  | 215000   | 14.0 | 1.24 | 0.85 | 0.41 |
| 2 AA      | 1           | 13.9           | 6490  | 234000   | 13.0 | 1.10 | 0.76 | 0.28 |
| 1 AA      | 1           | 14.6           | 4320  | 72000    | 14.0 | 1.20 | 0.90 | 0.78 |
| 2 AA      | 1           | 15.0           | 6710  | 152000   | 13.2 | 1.10 | 0.97 | 0.26 |
| 2 BB      | 2           | 14.2           | 7830  | 186000   | 12.0 | 0.90 | 1.65 | 0.45 |
| 2 AA      | 1           | 14.8           | 7320  | 222000   | 12.9 | 1.10 | 1.10 | 0.40 |
| 1 BB      | 2           | 13.4           | 5110  | 126000   | 14.3 | 1.20 | 0.70 | 0.48 |
| 2 BB      | 2           | 13.0           | 5920  | 107000   | 13.0 | 1.17 | 1.00 | 0.40 |
| 1 AA      | 1           | 14.9           | 7380  | 87000    | 14.9 | 1.28 | 1.17 | 0.43 |
| 1 BB      | 2           | 11.9           | 4330  | 128000   | 13.0 | 1.00 | 1.00 | 0.30 |
| 2 AA      | 1           | 17.0           | 10050 | 246000   | 13.7 | 1.19 | 1.70 | 0.50 |
| 1 AA      | 1           | 14.0           | 4300  | 106000   | 14.9 | 1.30 | 0.70 | 0.40 |
| 2 BB      | 2           | 16.9           | 6880  | 221000   | 12.0 | 1.00 | 0.97 | 0.38 |
| 2 AA      | 1           | 15.9           | 8110  | 302000   | 12.3 | 1.00 | 1.50 | 0.40 |
| 2 BB      | 2           | 15.1           | 3650  | 126000   | 13.3 | 1.10 | 0.70 | 0.30 |
| 1 AA      | 1           | 14.0           | 4610  | 153000   | 13.9 | 1.20 | 0.95 | 0.36 |
| 2 BB      | 2           | 14.0           | 5230  | 180000   | 12.8 | 1.00 | 0.56 | 0.21 |
| 2 BB      | 2           | 13.4           | 5600  | 321000   | 13.4 | 1.17 | 1.05 | 0.52 |
| 2 AA      | 1           | 13.2           | 5750  | 252000   | 12.2 | 1.08 | 1.06 | 0.27 |
| 2 BB      | 2           | 16.0           | 6890  | 184000   | 13.8 | 1.20 | 1.14 | 0.50 |
| 1 BB      | 2           | 13.6           | 6840  | 162000   | 13.7 | 1.19 | 0.55 | 0.21 |
| 2 AA      | 1           | 11.4           | 6500  | 256000   | 12.9 | 1.05 | 0.50 | 0.10 |
| 2 AA      | 1           | 13.2           | 6590  | 238000   | 12.4 | 1.09 | 1.08 | 0.42 |
| 1 BB      | 2           | 12.9           | 6990  | 142000   | 13.2 | 1.16 | 1.23 | 0.45 |
| 2 AA      | 1           | 14.4           | 10950 | 174000   | 13.3 | 1.10 | 1.08 | 0.48 |
| 2 BB      | 2           | 13.0           | 7800  | 233000   | 12.0 | 0.90 | 0.90 | 0.30 |
| 1 AA      | 1           | 14.0           | 9600  | 142000   | 13.2 | 1.10 | 1.20 | 0.50 |
| 2 AA      | 1           | 14.9           | 6000  | 230000   | 12.1 | 0.90 | 0.60 | 0.20 |
| 2 BB      | 2           | 15.0           | 7000  | 200000   | 12.2 | 0.90 | 1.00 | 0.40 |
| 2 BB      | 2           | 12.4           | 5380  | 118000   | 14.0 | 1.22 | 1.40 | 0.60 |
| 1 AA      | 1           | 11.8           | 4280  | 74000    | 17.0 | 1.50 | 1.50 | 0.80 |
| 2 BB      | 2           | 16.0           | 7700  | 131000   | 13.0 | 1.10 | 0.76 | 0.33 |
| 2 AA      | 1           | 15.2           | 7310  | 274000   | 11.0 | 0.80 | 0.98 | 0.37 |
| 2 AA      | 1           | 15.8           | 7920  | 217000   | 13.4 | 1.17 | 1.70 | 0.80 |
| 1 AA      | 1           | 13.6           | 4750  | 206000   | 12.0 | 0.80 | 1.06 | 0.33 |
| 2 BB      | 2           | 13.2           | 10840 | 321000   | 12.0 | 0.90 | 0.65 | 0.24 |
| 2 BB      | 2           | 13.9           | 6300  | 276000   | 11.4 | 1.01 | 0.46 | 0.20 |
| 1 AA      | 1           | 13.0           | 3090  | 133000   | 16.0 | 1.30 | 2.00 | 1.00 |
| 1 BB      | 2           | 14.5           | 4690  | 126000   | 13.5 | 1.19 | 1.10 | 0.40 |
| 1 AA      | 1           | 14.3           | 8760  | 107000   | 13.8 | 1.20 | 0.70 | 0.30 |
| 2 AA      | 1           | 13.0           | 6860  | 162000   | 1.3  | 1.40 | 1.40 | 0.75 |
| 2 AA      | 1           | 14.0           | 6700  | 346000   | 12.0 | 1.00 | 0.90 | 0.30 |
| 1 BB      | 2           | 11.0           | 3720  | 30000    | 14.8 | 1.28 | 2.10 | 0.90 |
| 1 AA      | 1           | 11.2           | 6110  | 91000    | 16.0 | 1.30 | 1.75 | 1.00 |
| 2 BB      | 2           | 13.7           | 8470  | 451000   | 11.3 | 1.00 | 1.30 | 0.60 |

|      |   |      |       |        |      |      |      |      |
|------|---|------|-------|--------|------|------|------|------|
| 1 BB | 2 | 13.2 | 3160  | 63000  | 14.0 | 1.20 | 1.50 | 0.60 |
| 1 BB | 2 | 14.0 | 5660  | 79000  | 14.0 | 1.21 | 2.50 | 1.00 |
| 2 AA | 1 | 13.6 | 10100 | 219000 | 12.0 | 1.00 | 1.11 | 0.50 |
| 1 BB | 2 | 13.9 | 2530  | 32000  | 19.0 | 1.60 | 2.00 | 1.70 |
| 1 BB | 2 | 13.6 | 5170  | 78000  | 12.5 | 1.00 | 1.80 | 1.00 |
| 1 AA | 1 | 12.7 | 2930  | 74000  | 15.0 | 1.30 | 1.80 | 0.80 |
| 2 AA | 1 | 12.9 | 8410  | 246000 | 11.0 | 0.90 | 0.65 | 0.26 |
| 2 BB | 2 | 13.5 | 8800  | 307000 | 14.0 | 1.20 | 0.60 | 0.30 |
| 2 BB | 2 | 12.0 | 6270  | 120000 | 11.0 | 1.00 | 0.50 | 0.20 |
| 2 AA | 1 | 13.5 | 11570 | 335000 | 11.0 | 0.90 | 0.70 | 0.50 |
| 2 AA | 1 | 14.0 | 5150  | 189000 | 13.0 | 1.10 | 0.80 | 0.36 |
| 2 BB | 2 | 13.0 | 6660  | 161000 | 12.4 | 1.09 | 1.28 | 0.40 |

| Albumin | Globulin | PreSGOT | PreSGPT | PreALP | PostSGOT | PostSGPT | PostALP | Cr   | Pre_VitD |
|---------|----------|---------|---------|--------|----------|----------|---------|------|----------|
| 4.3     | 3.7      | 45.00   | 47.00   | 50.00  | 37       | 41       | 55      | 0.90 | 14.10    |
| 4.4     | 4.1      | 68.00   | 103.00  | 80.00  | 73       | 106      | #NULL!  | 0.90 | 24.50    |
| 4.5     | 3.9      | 40.00   | 59.00   | 54.00  | #NULL!   | #NULL!   | #NULL!  | 0.80 | 22.00    |
| 3.7     | 3.7      | 433.00  | 400.00  | 70.00  | #NULL!   | #NULL!   | #NULL!  | 1.00 | 15.80    |
| 4.3     | 3.4      | 269.00  | 392.00  | 173.00 | 178      | 232      | #NULL!  | 0.90 | 29.60    |
| 3.9     | 4.1      | 20.00   | 23.00   | 20.00  | #NULL!   | #NULL!   | #NULL!  | 1.40 | 21.60    |
| 4.3     | 3.9      | 34.00   | 72.00   | 94.00  | 24       | 44       | 82      | 1.00 | 22.10    |
| 3.7     | 3.9      | 116.00  | 116.00  | 114.00 | 90       | 97       | #NULL!  | 0.60 | 16.10    |
| 3.9     | 3.4      | 33.00   | 28.00   | 64.00  | 37       | 36       | 57      | 0.60 | 9.50     |
| 3.8     | 4.8      | 65.00   | 60.00   | 101.00 | 47       | 40       | 95      | 0.80 | 19.60    |
| 3.9     | 3.2      | 40.00   | 45.00   | 89.00  | 50       | 62       | #NULL!  | 0.80 | 10.50    |
| 4.1     | 3.5      | 51.00   | 68.00   | 79.00  | 41       | 47       | 68      | 0.90 | 17.90    |
| 2.4     | 4.9      | 86.00   | 60.00   | 208.00 | 65       | 39       | 184     | 0.80 | 27.50    |
| 3.9     | 3.0      | 101.00  | 173.00  | 101.00 | 66       | 120      | 70      | 0.80 | 23.90    |
| 4.8     | 3.3      | 42.00   | 89.00   | 83.00  | 24       | 29       | #NULL!  | 1.20 | 22.70    |
| 3.9     | 3.0      | 94.00   | 54.00   | 99.00  | 43       | 78       | #NULL!  | 0.90 | 25.90    |
| 3.7     | 3.6      | 264.00  | 380.00  | 113.00 | 114      | 149      | 107     | 1.20 | 21.30    |
| 3.8     | 4.4      | 55.00   | 83.00   | 67.00  | 55       | 83       | 67      | 1.10 | 21.20    |
| 3.5     | 5.6      | 34.00   | 19.00   | 131.00 | #NULL!   | #NULL!   | #NULL!  | 0.60 | 10.10    |
| 4.0     | 3.6      | 61.00   | 51.00   | 68.00  | 43       | 37       | 65      | 0.70 | 16.00    |
| 4.1     | 4.2      | 68.00   | 133.00  | 56.00  | 48       | 73       | 46      | 1.10 | 18.90    |
| 3.8     | 2.2      | 21.00   | 17.00   | 74.00  | 25       | 26       | 78      | 0.68 | 15.60    |
| 3.0     | 3.4      | 51.00   | 55.00   | 87.00  | #NULL!   | #NULL!   | #NULL!  | 0.70 | 19.00    |
| 4.0     | 4.0      | 102.00  | 130.00  | 97.00  | 114      | 113      | 102     | 0.78 | 20.20    |
| 3.9     | 4.0      | 90.00   | 104.00  | 63.00  | 93       | 104      | #NULL!  | 0.70 | 26.30    |
| 4.2     | 3.8      | 74.00   | 204.00  | 69.00  | 23       | 33       | 56      | 1.10 | 22.20    |
| 4.7     | 3.5      | 53.00   | 71.00   | 93.00  | #NULL!   | #NULL!   | #NULL!  | 0.90 | 19.50    |
| 4.2     | 3.8      | 192.00  | 188.00  | 80.00  | #NULL!   | #NULL!   | #NULL!  | 0.80 | 19.70    |
| 4.1     | 3.9      | 25.00   | 80.00   | 64.00  | #NULL!   | #NULL!   | #NULL!  | 1.00 | 23.00    |
| 4.3     | 4.0      | 246.00  | 241.00  | 110.00 | #NULL!   | #NULL!   | #NULL!  | 0.90 | 24.00    |
| 3.6     | 3.7      | 203.00  | 255.00  | 150.00 | 236      | 274      | 144     | 0.70 | 13.90    |
| 3.5     | 4.4      | 96.00   | 103.00  | 129.00 | 76       | 69       | 76      | 1.00 | 20.00    |
| 3.8     | 3.7      | 107.00  | 80.00   | 124.00 | 86       | 51       | 106     | 0.70 | 23.00    |
| 4.4     | 3.8      | 91.00   | 121.00  | 101.00 | #NULL!   | 56       | 113     | 0.90 | 24.30    |
| 4.1     | 3.9      | 47.00   | 93.00   | 66.00  | 41       | 78       | 61      | 1.00 | 23.40    |
| 3.9     | 4.7      | 49.00   | 122.00  | 66.00  | 55       | 43       | 71      | 1.00 | 20.20    |
| 3.8     | 2.9      | 16.00   | 13.00   | 81.00  | 21       | 14       | #NULL!  | 0.70 | 20.10    |
| 4.4     | 2.8      | 17.00   | 21.00   | 57.00  | 15       | 16       | 54      | 0.70 | 19.00    |
| 3.0     | 4.3      | 105.00  | 82.00   | 82.00  | 114      | 48       | 75      | 0.60 | 10.10    |
| 3.6     | 4.1      | 155.00  | 233.00  | 137.00 | 160      | 240      | 129     | 0.80 | 16.10    |
| 3.5     | 3.9      | 68.00   | 66.00   | 122.00 | 51       | 61       | 138     | 1.10 | 21.20    |
| 3.5     | 4.8      | 181.00  | 184.00  | 130.00 | 154      | 173      | 115     | 0.70 | 12.20    |
| 4.0     | 3.9      | 476.00  | 450.00  | 100.00 | #NULL!   | #NULL!   | #NULL!  | 1.00 | 9.88     |
| 3.7     | 3.8      | 126.00  | 101.00  | 205.00 | #NULL!   | #NULL!   | #NULL!  | 0.80 | 16.20    |
| 3.0     | 4.4      | 94.00   | 90.00   | 117.00 | 128      | 58       | 136     | 0.80 | 22.70    |
| 4.3     | 4.0      | 52.00   | 40.00   | 107.00 | #NULL!   | #NULL!   | #NULL!  | 0.50 | 15.60    |



|     |     |        |        |        |        |        |        |        |       |
|-----|-----|--------|--------|--------|--------|--------|--------|--------|-------|
| 4.1 | 3.1 | 113.00 | 142.00 | 64.00  | 109    | 172    | 58     | 1.10   | 26.20 |
| 4.0 | 4.3 | 101.00 | 111.00 | 107.00 | 98     | 126    | 71     | 1.20   | 25.00 |
| 4.1 | 3.6 | 98.00  | 66.00  | 97.00  | 95     | 72     | 102    | 1.00   | 6.60  |
| 3.6 | 5.0 | 68.00  | 51.00  | 158.00 | 71     | 51     | 163    | 0.50   | 11.40 |
| 3.2 | 4.2 | 185.00 | 174.00 | 326.00 | 80     | 82     | 360    | 0.70   | 12.00 |
| 3.0 | 4.6 | 78.00  | 108.00 | 131.00 | 320    | 217    | 138    | 0.90   | 15.60 |
| 4.4 | 3.9 | 29.00  | 22.00  | 84.00  | 23     | 20     | 79     | 0.70   | 23.10 |
| 4.5 | 4.6 | 61.00  | 198.00 | 82.00  | 244    | 260    | 104    | 0.60   | 23.90 |
| 4.0 | 4.0 | 78.00  | 75.00  | 80.00  | 69     | 128    | 78     | #NULL! | 27.00 |
| 4.0 | 3.9 | 63.00  | 73.00  | #NULL! | 67     | 75     | 70     | 0.80   | 25.80 |
| 4.4 | 3.1 | 45.00  | 54.00  | 55.00  | 45     | 54     | 55     | 0.60   | 24.50 |
| 4.2 | 3.7 | 59.00  | 140.00 | 48.00  | #NULL! | #NULL! | #NULL! | 1.20   | 21.00 |

| VD_classifi | Classified_ | Post_VitD | Responder | Classify_Vi | VitD_chanç | Pre_TGFbe | Post_TGFb | TGFbeta_c | Pre_PDGF |
|-------------|-------------|-----------|-----------|-------------|------------|-----------|-----------|-----------|----------|
| 1           | 1           | 14.50     | #NULL!    | 1           | 0.40       | 694.37    | 630.83    | -63.54    | 111.71   |
| 2           | 2           | 19.10     | #NULL!    | 1           | -5.40      | 357.98    | 644.47    | 286.49    | 199.55   |
| 2           | 2           | 56.00     | 1         | 2           | 34.00      | 620.85    | 403.30    | -217.55   | 164.67   |
| 1           | 1           | 25.90     | 2         | 1           | 10.10      | 886.15    | 514.74    | -371.41   | 150.87   |
| 2           | 2           | 27.90     | 2         | 1           | -1.70      | 675.50    | 549.29    | -126.21   | 202.95   |
| 2           | 2           | 24.20     | #NULL!    | 1           | 2.60       | 669.87    | 669.60    | -0.27     | 231.39   |
| 2           | 2           | 61.50     | 1         | 2           | 39.40      | 572.15    | 539.72    | -32.43    | 179.77   |
| 1           | 1           | 22.70     | #NULL!    | 1           | 6.60       | 821.57    | 999.70    | 178.13    | 101.76   |
| 1           | 1           | 14.80     | #NULL!    | 1           | 5.30       | 423.30    | 399.58    | -23.72    | 45.91    |
| 1           | 1           | 49.70     | 1         | 2           | 30.10      | 195.97    | 308.86    | 112.89    | 53.52    |
| 1           | 1           | 10.40     | #NULL!    | 1           | -0.10      | 921.85    | 807.48    | -114.37   | 32.69    |
| 1           | 1           | 70.80     | 1         | 2           | 52.90      | 311.14    | 395.10    | 83.96     | 134.19   |
| 2           | 2           | 34.10     | 1         | 2           | 6.60       | 833.72    | 1001.66   | 167.94    | 156.40   |
| 2           | 2           | 24.30     | #NULL!    | 1           | 0.40       | 438.97    | 664.74    | 225.77    | 137.68   |
| 2           | 2           | 52.80     | 1         | 2           | 30.10      | 823.59    | 619.09    | -204.50   | 168.80   |
| 2           | 2           | 24.80     | #NULL!    | 1           | -1.10      | 1127.10   | 1058.22   | -68.88    | 194.11   |
| 2           | 2           | 43.10     | 1         | 2           | 21.80      | 574.82    | 560.61    | -14.21    | 85.96    |
| 2           | 2           | 22.00     | #NULL!    | 1           | 0.80       | 363.53    | 451.53    | 88.00     | 196.83   |
| 1           | 1           | 14.30     | #NULL!    | 1           | 4.20       | 558.84    | 584.15    | 25.31     | 155.02   |
| 1           | 1           | 52.60     | 1         | 2           | 36.60      | 684.91    | 711.70    | 26.79     | 80.16    |
| 1           | 1           | 18.30     | #NULL!    | 1           | -0.60      | 862.34    | 754.60    | -107.74   | 140.46   |
| 1           | 1           | 18.20     | #NULL!    | 1           | 2.60       | 785.54    | 799.48    | 13.94     | 180.45   |
| 1           | 1           | 55.80     | 1         | 2           | 36.80      | 840.84    | 900.24    | 59.40     | 103.89   |
| 2           | 2           | 37.30     | 1         | 2           | 17.10      | 643.82    | 588.15    | -55.67    | 125.09   |
| 2           | 2           | 25.80     | #NULL!    | 1           | -0.50      | 790.51    | 792.50    | 1.99      | 111.70   |
| 2           | 2           | 34.30     | 1         | 2           | 12.10      | 562.38    | 537.95    | -24.43    | 199.55   |
| 1           | 1           | 19.70     | #NULL!    | 1           | 0.20       | 506.51    | 549.88    | 43.37     | 181.14   |
| 1           | 1           | 51.00     | 1         | 2           | 31.30      | 843.90    | 875.77    | 31.87     | 54.27    |
| 2           | 2           | 41.00     | 1         | 2           | 18.00      | 628.17    | 700.56    | 72.39     | 87.40    |
| 2           | 2           | 25.00     | #NULL!    | 1           | 1.00       | 972.20    | 894.07    | -78.13    | 79.43    |
| 1           | 1           | 10.40     | #NULL!    | 1           | -3.50      | 284.41    | 298.96    | 14.55     | 106.74   |
| 2           | 2           | 38.50     | 1         | 2           | 18.50      | 529.88    | 504.27    | -25.61    | 41.29    |
| 2           | 2           | 20.10     | #NULL!    | 1           | -2.90      | 816.53    | 1071.66   | 255.13    | 168.11   |
| 2           | 2           | 64.40     | 1         | 2           | 40.10      | 637.36    | 700.74    | 63.38     | 225.98   |
| 2           | 2           | 58.90     | 1         | 2           | 35.50      | 1082.22   | 1014.87   | -67.35    | 248.90   |
| 2           | 2           | 35.00     | 1         | 2           | 14.80      | 859.26    | 966.54    | 107.28    | 166.74   |
| 2           | 2           | 24.00     | #NULL!    | 1           | 3.90       | 867.50    | 1099.06   | 231.56    | 168.11   |
| 1           | 1           | 20.90     | #NULL!    | 1           | 1.90       | 879.92    | 869.26    | -10.66    | 151.56   |
| 1           | 1           | 30.00     | 2         | 2           | 20.70      | 1041.58   | 901.83    | -139.75   | 63.99    |
| 1           | 1           | 15.10     | #NULL!    | 1           | -1.00      | 412.65    | 464.01    | 51.36     | 269.71   |
| 2           | 2           | 42.70     | 1         | 2           | 21.50      | 492.00    | 378.22    | -113.78   | 108.60   |
| 1           | 1           | 31.20     | 1         | 2           | 19.00      | 546.93    | 550.07    | 3.14      | 104.81   |
| 1           | 1           | 40.90     | 1         | 2           | 31.02      | 680.16    | 598.58    | -81.58    | 160.17   |
| 1           | 1           | 14.30     | #NULL!    | 1           | -1.90      | 115.03    | 122.31    | 7.28      | 0.06     |
| 2           | 2           | 49.60     | 1         | 2           | 26.90      | 747.92    | 750.54    | 2.62      | 47.03    |
| 1           | 1           | 18.10     | #NULL!    | 1           | 2.50       | 909.98    | 1055.63   | 145.65    | 120.60   |

|   |   |       |        |    |       |        |         |        |        |
|---|---|-------|--------|----|-------|--------|---------|--------|--------|
| 2 | 2 | 25.60 | #NULL! | 1  | -0.60 | 323.62 | 379.64  | 56.02  | 33.09  |
| 2 | 2 | 22.00 | #NULL! | 1  | -3.00 | 597.77 | 696.24  | 98.47  | 59.43  |
| 1 | 1 | 66.80 | 1      | 2  | 60.20 | 260.76 | 298.33  | 37.57  | 128.78 |
| 1 | 1 | 12.51 | #NULL! | 1  | 1.11  | 189.40 | 239.68  | 50.28  | 10.23  |
| 1 | 1 | 9.80  | #NULL! | 1  | -2.20 | 250.18 | 286.16  | 35.98  | 43.74  |
| 1 | 1 | 24.00 | 2      | 1  | 8.40  | 337.45 | 320.18  | -17.27 | 42.42  |
| 2 | 2 | 54.80 | 1      | 2  | 31.70 | 796.56 | 732.26  | -64.30 | 130.67 |
| 2 | 2 | 27.00 | #NULL! | 1  | 3.10  | 930.02 | 1114.61 | 184.59 | 123.12 |
| 2 | 2 | 27.90 | 1      | 1  | 0.90  | 481.56 | 531.34  | 49.78  | 61.37  |
| 2 | 2 | 46.70 | 2      | 21 | 20.90 | 849.23 | 910.94  | 61.71  | 242.98 |
| 2 | 2 | 45.60 | 2      | 21 | 21.10 | 618.03 | 629.47  | 11.44  | 63.31  |
| 2 | 2 | 22.80 | 1      | 2  | 1.80  | 322.93 | 403.30  | 80.37  | 158.29 |

| Post_PDGF | PDGF_char | Pre_TIMP | Post_TIMP | TIMP_Char | Pre_MMP2 | Post_MMF | MMP2_ch | Pre_MMP2 | Post_MMF |
|-----------|-----------|----------|-----------|-----------|----------|----------|---------|----------|----------|
| 105.32    | -6.39     | 1.23     | 1.28      | 0.05      | 354.30   | 326.54   | -27.76  | 169.49   | 165.38   |
| 146.72    | -52.83    | 2.39     | 2.40      | 0.01      | 452.69   | 469.58   | 16.89   | 172.30   | 173.50   |
| 149.49    | -15.18    | 1.54     | 1.27      | -0.27     | 339.35   | 316.73   | -22.62  | 162.60   | 173.88   |
| 63.99     | -86.88    | 2.56     | 1.55      | -1.01     | 600.08   | 691.57   | 91.49   | 267.87   | 161.55   |
| 110.29    | -92.66    | 1.68     | 1.38      | -0.30     | 502.50   | 523.76   | 21.26   | 125.70   | 191.31   |
| 93.89     | -137.50   | 2.93     | 3.74      | 0.81      | 297.59   | 347.61   | 50.02   | 203.18   | 193.03   |
| 131.40    | -48.37    | 1.84     | 1.77      | -0.07     | 274.64   | 275.18   | 0.54    | 403.09   | 444.07   |
| 88.85     | -12.91    | 1.81     | 1.61      | -0.20     | 501.04   | 446.84   | -54.20  | 370.48   | 312.47   |
| 43.61     | -2.30     | 1.64     | 1.61      | -0.03     | 445.15   | 321.93   | -123.22 | 111.89   | 81.15    |
| 61.76     | 8.24      | 1.81     | 1.01      | -0.80     | 410.18   | 387.38   | -22.80  | 94.05    | 124.01   |
| 27.10     | -5.59     | 1.69     | 1.69      | 0.00      | 426.35   | 330.20   | -96.15  | 91.68    | 70.23    |
| 114.54    | -19.65    | 1.40     | 1.34      | -0.06     | 259.75   | 248.60   | -11.15  | 403.58   | 455.69   |
| 71.38     | -85.02    | 2.84     | 2.35      | -0.49     | 613.77   | 552.22   | -61.55  | 92.68    | 100.63   |
| 191.19    | 53.51     | 2.19     | 2.13      | -0.06     | 355.98   | 311.28   | -44.70  | 159.78   | 133.08   |
| 188.65    | 19.85     | 1.44     | 1.22      | -0.22     | 275.45   | 366.09   | 90.64   | 135.27   | 202.73   |
| 183.87    | -10.24    | 1.94     | 2.03      | 0.09      | 293.44   | 309.22   | 15.78   | 83.30    | 88.76    |
| 106.03    | 20.07     | 3.29     | 2.84      | -0.45     | 445.78   | 515.60   | 69.82   | 87.68    | 135.67   |
| 159.16    | -37.67    | 2.57     | 2.79      | 0.22      | 396.95   | 203.94   | -193.01 | 106.54   | 80.43    |
| 155.71    | 0.69      | 1.33     | 1.36      | 0.03      | 209.08   | 276.40   | 67.32   | 204.14   | 206.57   |
| 122.29    | 42.13     | 1.96     | 3.04      | 1.08      | 503.00   | #NULL!   | #NULL!  | 96.07    | #NULL!   |
| 120.88    | -19.58    | 1.19     | 1.24      | 0.05      | 448.44   | 374.16   | -74.28  | #NULL!   | 112.88   |
| 132.09    | -48.36    | 2.30     | 2.42      | 0.12      | 295.07   | 544.33   | 249.26  | 270.64   | 214.73   |
| 135.59    | 31.70     | 1.98     | 1.95      | -0.03     | 250.19   | 540.45   | 290.26  | 183.31   | 228.00   |
| 139.77    | 14.68     | 1.93     | 1.55      | -0.38     | 491.22   | 561.74   | 70.52   | 158.97   | 189.40   |
| 124.39    | 12.69     | 2.11     | 2.49      | 0.38      | 516.75   | 348.42   | -168.33 | 133.72   | 90.35    |
| 199.55    | 0.00      | 2.46     | 2.28      | -0.18     | 322.87   | 287.88   | -34.99  | 169.59   | 179.70   |
| 170.17    | -10.97    | 2.43     | 2.95      | 0.52      | 410.94   | 560.59   | 149.65  | 202.30   | 195.28   |
| 46.68     | -7.59     | 1.59     | 1.64      | 0.05      | 430.46   | #NULL!   | #NULL!  | 73.59    | #NULL!   |
| 98.90     | 11.50     | 2.62     | 3.23      | 0.61      | 288.55   | 596.33   | 307.78  | 125.14   | 162.90   |
| 96.04     | 16.61     | 1.47     | 1.65      | 0.18      | 429.78   | 485.45   | 55.67   | 61.36    | 52.81    |
| 80.50     | -26.24    | 1.77     | 1.67      | -0.10     | 745.16   | 542.05   | -203.11 | 76.01    | 56.71    |
| 3.79      | -37.50    | 2.65     | 2.50      | -0.15     | #NULL!   | 501.64   | #NULL!  | #NULL!   | 150.64   |
| 106.74    | -61.37    | 2.87     | 3.33      | 0.46      | 588.69   | #NULL!   | #NULL!  | 281.19   | #NULL!   |
| 192.06    | -33.92    | 2.85     | 2.27      | -0.58     | 565.07   | #NULL!   | #NULL!  | 423.52   | #NULL!   |
| 223.38    | -25.52    | 1.79     | 2.07      | 0.28      | 401.42   | 380.97   | -20.45  | 212.86   | 271.17   |
| 155.02    | -11.72    | 1.42     | 1.52      | 0.10      | 474.14   | 371.37   | -102.77 | 143.72   | 178.06   |
| 179.08    | 10.97     | 2.04     | 2.46      | 0.42      | 191.73   | 252.50   | 60.77   | 424.75   | 327.27   |
| 114.53    | -37.03    | 2.46     | 2.39      | -0.07     | 495.52   | 433.71   | -61.81  | #NULL!   | 582.14   |
| 50.48     | -13.51    | 2.59     | 2.30      | -0.29     | 727.13   | 845.32   | 118.19  | 136.95   | 184.84   |
| 107.45    | -162.26   | 2.26     | 2.64      | 0.38      | 391.47   | 344.20   | -47.27  | 131.91   | 70.51    |
| 97.85     | -10.75    | 2.49     | 2.81      | 0.32      | 500.40   | 497.33   | -3.07   | 116.37   | 185.75   |
| 78.75     | -26.06    | 2.54     | 2.39      | -0.15     | 453.96   | 260.64   | -193.32 | 205.98   | 190.24   |
| 87.68     | -72.49    | 2.85     | 2.37      | -0.48     | 389.01   | 520.95   | 131.94  | 257.86   | 304.00   |
| 0.98      | 0.92      | 0.16     | 4.41      | 4.25      | 688.25   | 506.41   | -181.84 | 91.42    | 91.21    |
| 50.31     | 3.28      | 2.84     | 2.89      | 0.05      | #NULL!   | #NULL!   | #NULL!  | 87.24    | 152.22   |
| 126.26    | 5.66      | 2.13     | 2.67      | 0.54      | 494.28   | 188.24   | -306.04 | 173.01   | 148.95   |

|        |        |      |      |       |        |        |         |        |        |
|--------|--------|------|------|-------|--------|--------|---------|--------|--------|
| 50.96  | 17.87  | 2.24 | 2.85 | 0.61  | 537.94 | #NULL! | #NULL!  | 118.63 | #NULL! |
| 34.44  | -24.99 | 3.47 | 3.96 | 0.49  | 470.53 | 516.97 | 46.44   | 57.43  | 72.65  |
| 125.63 | -3.15  | 4.10 | 3.54 | -0.56 | 539.31 | #NULL! | #NULL!  | 202.37 | #NULL! |
| 12.39  | 2.16   | 1.53 | 1.77 | 0.24  | 879.49 | #NULL! | #NULL!  | 57.84  | #NULL! |
| 36.44  | -7.30  | 2.42 | 2.50 | 0.08  | 192.60 | 260.31 | 67.71   | 69.98  | 50.87  |
| 39.11  | -3.31  | 1.96 | 2.34 | 0.38  | #NULL! | 765.62 | #NULL!  | 99.23  | 161.93 |
| 111.76 | -18.91 | 2.30 | 2.17 | -0.13 | 200.23 | 428.21 | 227.98  | 198.59 | 200.45 |
| 106.71 | -16.41 | 1.57 | 2.23 | 0.66  | 254.15 | #NULL! | #NULL!  | 176.72 | #NULL! |
| 65.25  | 3.88   | 2.10 | 2.68 | 0.58  | 588.46 | 383.98 | -204.48 | 123.65 | 98.79  |
| 255.58 | 12.60  | 2.57 | 2.51 | -0.06 | 395.49 | 547.08 | 151.59  | 296.14 | 324.42 |
| 62.02  | -1.29  | 1.66 | 1.67 | 0.01  | 176.38 | 214.43 | 38.05   | 75.01  | 157.84 |
| 88.32  | -69.97 | 2.12 | 2.13 | 0.01  | #NULL! | #NULL! | #NULL!  | #NULL! | #NULL! |

MMP9\_ch:filter\_5

|         |   |
|---------|---|
| -4.11   | 0 |
| 1.20    | 0 |
| 11.28   | 1 |
| -106.32 | 1 |
| 65.61   | 1 |
| -10.15  | 0 |
| 40.98   | 1 |
| -58.01  | 0 |
| -30.74  | 0 |
| 29.96   | 1 |
| -21.45  | 0 |
| 52.11   | 1 |
| 7.95    | 1 |
| -26.70  | 0 |
| 67.46   | 1 |
| 5.46    | 0 |
| 47.99   | 1 |
| -26.11  | 0 |
| 2.43    | 0 |
| #NULL!  | 1 |
| #NULL!  | 0 |
| -55.91  | 0 |
| 44.69   | 1 |
| 30.43   | 1 |
| -43.37  | 0 |
| 10.11   | 1 |
| -7.02   | 0 |
| #NULL!  | 1 |
| 37.76   | 1 |
| -8.55   | 0 |
| -19.30  | 0 |
| #NULL!  | 1 |
| #NULL!  | 0 |
| #NULL!  | 1 |
| 58.31   | 1 |
| 34.34   | 1 |
| -97.48  | 0 |
| #NULL!  | 0 |
| 47.89   | 1 |
| -61.40  | 0 |
| 69.38   | 1 |
| -15.74  | 1 |
| 46.14   | 1 |
| -0.21   | 0 |
| 64.98   | 1 |
| -24.06  | 0 |

|        |   |
|--------|---|
| #NULL! | 0 |
| 15.22  | 0 |
| #NULL! | 1 |
| #NULL! | 0 |
| -19.11 | 0 |
| 62.70  | 1 |
| 1.86   | 1 |
| #NULL! | 0 |
| -24.86 | 0 |
| 28.28  | 1 |
| 82.83  | 1 |
| #NULL! | 0 |
